# Supplementary material for: Increase in Fruity Ester Production during Spine Grape Wine Fermentation by Goal-Directed Amino Acid Supplementation
Source: MDPI journal article supplement (doi:10.3390/fermentation7040231), 2021-10-16
Supplement: s1 [file fermentation-1398161-supplementary.pdf › fermentation-1398161-supplementary.pdf]

# **Supplementary data for**

## **Increase in fruity ester production during spine wine**

### **fermentation by goal-directed amino acid**

### **supplementation**

**Zijian Zhu <sup>1</sup>, Kai Hu <sup>1</sup>, Siyu Chen <sup>1</sup>, Sirui Xiong <sup>1</sup> and Yongsheng Tao <sup>1,2,\*</sup>**

<sup>1</sup> College of Enology, Northwest A&F University, Yangling, Shaanxi 712100, China

<sup>2</sup> Shaanxi Engineering Research Center for Viti-viniculture, Yangling, Shaanxi 712100, China

\*Corresponding author: Yongsheng Tao

Email: [taoyongsheng@nwsuaf.edu.cn](mailto:taoyongsheng@nwsuaf.edu.cn)

Tel: 0086-87092107, Fax: 0086-87091994

## Supplementary Tables Captions

Table S1 Qualitative and quantitative information of chromatographically pure standards in HPLC analysis. SKU-Pack size was given by DrE, Yuanye and Solarbio. Y: peak area versus; X: concentration.

Table S2 Qualitative and quantitative information of chromatographically pure standards in SPME-GC-MS analysis. SKU-Pack Size was given by Sigma-Aldrich. Y: concentration (mg/L); X: relative peak area versus the area of the internal standard (2-octanol).

Table S3 Concentrations of yeast assimilable nitrogen in different nitrogen treatments and controls. No significant difference after nitrogen nutrient supplementation. CK-CS: Cabernet Sauvignon control; CK-SP: spine grape control. IN: DAP supplement; AA-Ala: single alanine supplement; AA-Phe: single phenylalanine supplement; AA-Ile: single isoleucine supplement; MAA: mixed nitrogen supplement with alanine, phenylalanine and isoleucine; IN+MAA: mixed nitrogen supplement with DAP, alanine, phenylalanine, and isoleucine.

Table S4 Evolution of amino acid content during alcoholic fermentation of spine grape and Cabernet Sauvignon grape ( $\mu\text{mol/L}$ ). Data are mean values of two independent experiments  $\pm$  standard deviation.

Table S5 Concentrations of wine fruity esters during alcoholic fermentation of Cabernet Sauvignon grape ( $\mu\text{g/L}$ ). Data are mean values of two independent experiments  $\pm$  standard deviation.

Table S6 Concentration of wine fruity esters during alcoholic fermentation of spine grape ( $\mu\text{g/L}$ ). Data are mean values of two independent experiments  $\pm$  standard deviation.

Table S7 Pearson's correlation coefficients ( $r$ ) between amino acids and wine fruity esters during alcoholic fermentation.

Table S8 Physiochemical indices of wine samples. CK-CS: Cabernet Sauvignon control; CK-SP: spine grape control. IN: DAP supplement; AA-Ala: single alanine supplement; AA-Phe: single phenylalanine supplement; AA-Ile: single isoleucine supplement; MAA: mixed nitrogen supplement with alanine, phenylalanine and isoleucine; IN+MAA: mixed nitrogen supplement with DAP, alanine, phenylalanine, and isoleucine.

Table S1 Qualitative and quantitative information of chromatographically pure standards in HPLC analysis.

| Standards                                       | Purity | SKU-Pack size* | RT (min) | Regression equation   | R <sup>2</sup> | Calibrated interval |
|-------------------------------------------------|--------|----------------|----------|-----------------------|----------------|---------------------|
| <b>Column: Welch Ultimate AQ-C<sub>18</sub></b> |        |                |          |                       |                | (mg/L)              |
| L-malic acid                                    | ≥99.0% | 5g             | 4.48     | Y = 586136 X - 8809   | 0.9991         | 3.13-4000           |
| Acetic acid                                     | ≥99.8% | 1mL            | 5.21     | Y = 653519 X + 1824   | 0.9999         | 3.13-4000           |
| Citric acid                                     | ≥99.5% | 0.1g           | 7.81     | Y = 688652 X - 5359   | 0.9998         | 3.13-4000           |
| Succinic acid                                   | ≥99.0% | 0.25g          | 9.17     | Y = 296691 X - 6416   | 0.9991         | 1.56-2000           |
| <b>Column: Welch Ultimate XB-NH<sub>2</sub></b> |        |                |          |                       |                | (mg/L)              |
| Glycerol                                        | ≥99.5% | 1mL            | 7.84     | Y = 315934 X - 2320   |                |                     |
| <b>Column: Agilent ZORBAX SB-C<sub>18</sub></b> |        |                |          |                       |                | (mmol/L)            |
| L-aspartic acid                                 | ≥98.0% | B21934-200mg   | 3.92     | Y = 2079746 X + 11424 | 0.9966         | 0.001-0.1           |
| L-glutamic acid                                 | ≥98.0% | YZ140690-100mg | 5.06     | Y = 2171807 X + 7568  | 0.9984         | 0.003-0.1           |
| L-arginine                                      | ≥98.0% | B21920-200mg   | 10.81    | Y = 1666352 X + 5590  | 0.9976         | 0.02-0.8            |
| L-proline                                       | ≥99.0% | B21914-200mg   | 12.25    | Y = 2202082 X + 20061 | 0.9999         | 0.08-5.6            |
| γ-aminobutyric acid                             | ≥99.0% | B21979-100mg   | 13.16    | Y = 2233401 X + 26225 | 0.9967         | 0.006-0.1           |
| L-alanine                                       | ≥98.0% | B21911-200mg   | 13.87    | Y = 2050799 X + 14230 | 0.9964         | 0.006-0.1           |
| L-valine                                        | ≥98.0% | SV8010-200mg   | 21.89    | Y = 2519184 X + 6045  | 0.9968         | 0.006-0.1           |
| L-methionine                                    | ≥98.0% | B21913-200mg   | 23.08    | Y = 938054 X + 13076  | 0.9971         | 0.01-0.5            |
| L-isoleucine                                    | ≥98.0% | B21937-200mg   | 27.49    | Y = 1493240 X + 12448 | 0.9957         | 0.01-0.5            |
| L-leucine                                       | ≥99.0% | YZ140687-100mg | 28.02    | Y = 1356899 X + 35778 | 0.9962         | 0.01-0.5            |
| L-tryptophan                                    | ≥98.0% | B21930-200mg   | 29.22    | Y = 1452635 X - 1620  | 0.9986         | 0.01-0.8            |
| L-phenylalanine                                 | ≥98.0% | B21910-200mg   | 29.76    | Y = 1720549 X + 4175  | 0.9967         | 0.01-0.5            |
| L-tyrosine                                      | ≥99.0% | B21924-200mg   | 37.31    | Y = 811523 X - 5991   | 0.9978         | 0.01-0.5            |

\*SKU-Pack size was given by DrE, Yuanye and Solarbio.

Y: peak area versus; X: concentration.

Table S2 Qualitative and quantitative information of chromatographically pure standards in SPME-GC-MS analysis.

| Standards         | Purity      | SKU-Pack size* | RT (min) | Regression equation | R <sup>2</sup> | Calibrated interval (µg/L) |
|-------------------|-------------|----------------|----------|---------------------|----------------|----------------------------|
| Ethyl acetate     | ≥99.9% (GC) | 58958-5ML      | 7.98     | Y = 31328X + 444    | 0.9947         | 600-90200                  |
| Isobutyl acetate  | ≥99.8% (GC) | 94823-1ML-F    | 11.72    | Y = 2522 X - 5      | 0.9995         | 2-240                      |
| Isoamyl acetate   | ≥99.7% (GC) | 79857-1ML      | 19.16    | Y = 409X + 48       | 0.9998         | 53-8000                    |
| Hexyl acetate     | ≥99.7% (GC) | 25539-1ML      | 20.96    | Y = 126X + 25       | 0.9982         | 7-1000                     |
| Phenethyl acetate | ≥97.0% (GC) | 73747-1ML      | 37.25    | Y = 401X + 13       | 0.9982         | 4-600                      |
| Ethyl butyrate    | ≥99.5% (GC) | 75563-1ML      | 12.16    | Y = 3367X - 45      | 0.9993         | 7-1080                     |
| Ethyl hexanoate   | ≥99.5% (GC) | 08375-1ML      | 19.71    | Y = 1047X + 206     | 0.9952         | 24-3600                    |
| Ethyl octanoate   | ≥99.0% (GC) | 44879-1ML      | 26.99    | Y = 958X + 150      | 0.9901         | 20-3000                    |
| Ethyl decanoate   | ≥99.0% (GC) | 00733-1ML      | 33.81    | Y = 2925X - 11      | 0.9990         | 5-800                      |
| Isobutyl alcohol  | ≥99.8% (GC) | 82059-1ML-F    | 14.39    | Y = 111711X + 2766  | 0.9981         | 600-90000                  |
| Isoamyl alcohol   | ≥98.5% (GC) | 77664-1ML      | 18.47    | Y = 21262X - 2751   | 0.9994         | 2157-323600                |
| 2-phenylethanol   | ≥99.0% (GC) | 77861-250ML    | 39.42    | Y = 355959X + 32    | 0.9983         | 1333-200000                |
| Hexanoic acid     | ≥99.0% (GC) | 21529-5ML      | 37.63    | Y = 12213X + 194    | 0.9952         | 120-3600                   |
| Octanoic acid     | ≥99.5% (GC) | 21639-5ML      | 43.08    | Y = 581X + 128      | 0.9993         | 40-6000                    |
| Decanoic acid     | ≥99.5% (GC) | 21409-5G       | 48.48    | Y = 512X + 46       | 0.9977         | 47-1400                    |

\*SKU-Pack Size was given by Sigma-Aldrich.

Y: concentration (µg/L); X: relative peak area versus the area of the internal standard (2-octanol).

Table S3 Concentrations of yeast assimilable nitrogen in different nitrogen treatments and controls.

|        | YAN (mg N/L)<br>(Before treating) | Nitrogen nutrient supplements (mg/L) |     |     |     | YAN (mg N/L)<br>(After treating)* |
|--------|-----------------------------------|--------------------------------------|-----|-----|-----|-----------------------------------|
|        |                                   | DAP                                  | Ala | Phe | Ile |                                   |
| CK-CS  | 187.0±2.8                         | -                                    | -   | -   | -   | -                                 |
| CK-SP  | 136.2±3.6                         | -                                    | -   | -   | -   | -                                 |
| IN     | 136.7±3.1                         | 236                                  | -   | -   | -   | 185.9±1.6                         |
| AA-Ala | 136.6±2.3                         | -                                    | 318 | -   | -   | 185.3±1.9                         |
| AA-Phe | 137.2±2.3                         | -                                    | -   | 589 | -   | 187.9±2.0                         |
| AA-Ile | 136.0±1.8                         | -                                    | -   | -   | 468 | 187.1±3.7                         |
| MAA    | 136.5±1.6                         | -                                    | 163 | 71  | 170 | 187.6±1.5                         |
| IN+MAA | 136.1±3.0                         | 178                                  | 39  | 17  | 39  | 186.7±3.8                         |

\* No significant difference after nitrogen nutrient supplementation.

CK-CS: Cabernet Sauvignon control; CK-SP: spine grape control. IN: DAP supplement; AA-Ala: single alanine supplement; AA-Phe: single phenylalanine supplement; AA-Ile: single isoleucine supplement; MAA: mixed nitrogen supplement with alanine, phenylalanine and isoleucine; IN+MAA: mixed nitrogen supplement with DAP, alanine, phenylalanine, and isoleucine.

Table S4 Evolution of amino acid contents during alcoholic fermentation of spine grape and Cabernet Sauvignon grape (μmol/L)

| Variety            | Amino acid | Must            | 1 d             | 2 d              | 3 d              | 5 d             | 7 d            | 10 d           | 12 d            |
|--------------------|------------|-----------------|-----------------|------------------|------------------|-----------------|----------------|----------------|-----------------|
| Cabernet Sauvignon | Asp        | 11.7 ± 2.6      | 8.5 ± 0.1       | 4.6 ± 0.4        | 4.5 ± 0.3        | 1.6 ± 0.2       | 0.8 ± 0.1      | 0.7 ± 0.2      | ND              |
|                    | Glu        | 14.9 ± 0.2      | 11.4 ± 1.2      | 6.6 ± 0.1        | 3.0 ± 1.2        | 2.4 ± 0.2       | 2.0 ± 0.1      | 1.8 ± 0.2      | 2.5 ± 0.1       |
|                    | Arg        | 273.2 ± 1.5     | 271.0 ± 3.0     | 148.5 ± 19.0     | 87.1 ± 21.5      | 18.4 ± 1.6      | 18.0 ± 0.1     | 17.1 ± 0.3     | 9.4 ± 0.2       |
|                    | Pro        | 10868.6 ± 108.0 | 11414.0 ± 154.0 | 11212.7 ± 1432.4 | 10906.0 ± 5453.0 | 11725.8 ± 414.1 | 10248.6 ± 15.9 | 9391.4 ± 198.3 | 10349.4 ± 171.8 |
|                    | GABA       | 59.9 ± 0.5      | 44.1 ± 1.6      | 23.9 ± 2.3       | 7.3 ± 0.9        | ND              | ND             | ND             | ND              |
|                    | Ala        | 48.1 ± 4.4      | 49.8 ± 0.3      | 51.6 ± 6.7       | 33.7 ± 0.1       | 21.6 ± 5.0      | 5.4 ± 0.1      | 3.2 ± 0.1      | 1.5 ± 0.2       |
|                    | Val        | 14.3 ± 0.3      | 8.4 ± 0.1       | 3.4 ± 0.1        | 1.1 ± 0.1        | 0.8 ± 0.1       | 0.6 ± 0.1      | 0.4 ± 0.3      | ND              |
|                    | Met        | 19.9 ± 2.9      | 11.4 ± 2.3      | 6.6 ± 1.3        | 4.0 ± 0.7        | 1.0 ± 0.3       | 0.2 ± 0.1      | ND             | ND              |
|                    | Ile        | 37.6 ± 2.5      | 24.0 ± 2.5      | 9.6 ± 1.4        | 3.7 ± 0.2        | 1.4 ± 0.1       | 1.5 ± 0.1      | 1.7 ± 0.1      | 0.9 ± 0.1       |
|                    | Leu        | 20.1 ± 3.4      | 16.5 ± 2.1      | 8.9 ± 1.7        | 3.7 ± 1.9        | 0.2 ± 0.3       | ND             | ND             | ND              |
|                    | Trp        | 22.3 ± 2.1      | 13.6 ± 1.7      | 3.8 ± 0.41       | 3.0 ± 0.38       | 1.5 ± 0.39      | 1.0 ± 0.27     | 0.5 ± 0.17     | ND              |
|                    | Phe        | 15.4 ± 0.9      | 14.4 ± 0.2      | 13.3 ± 1.8       | 7.6 ± 0.6        | 0.8 ± 0.3       | ND             | ND             | ND              |
|                    | Tyr        | 21.1 ± 0.4      | 20.1 ± 0.1      | 19.0 ± 0.7       | 18.7 ± 0.9       | 12.1 ± 0.1      | 12.5 ± 0.1     | 13.1 ± 6.6     | 13.2 ± 0.1      |
| Spine grape        | Asp        | 28.1 ± 4.0      | 30.9 ± 0.7      | 25.5 ± 2.3       | 24.1 ± 0.5       | 18.0 ± 1.4      | 13.5 ± 0.2     | 9.8 ± 0.4      | 8.5 ± 0.1       |
|                    | Glu        | 63.4 ± 18.0     | 64.0 ± 0.5      | 56.9 ± 3.2       | 37.9 ± 1.9       | 7.5 ± 0.4       | 5.5 ± 0.4      | 4.1 ± 0.7      | 3.9 ± 0.1       |
|                    | Arg        | 814.7 ± 33.8    | 85.1 ± 0.5      | 81.1 ± 5.3       | 67.6 ± 2.2       | 47.7 ± 3.7      | 32.9 ± 1.6     | 21.7 ± 4.3     | 46.3 ± 28.7     |
|                    | Pro        | 1316.4 ± 79.4   | 1523.0 ± 3.0    | 1515.4 ± 35.4    | 1774.0 ± 15.0    | 1936.5 ± 53.9   | 1936.0 ± 9.6   | 2021.6 ± 193.2 | 3472.2 ± 228.0  |
|                    | GABA       | 463.0 ± 3.2     | 418.5 ± 7.5     | 406.2 ± 31.7     | 338.5 ± 17.5     | 212.0 ± 53.9    | 128.6 ± 4.0    | ND             | ND              |
|                    | Ala        | 5.1 ± 0.1       | 3.7 ± 0.3       | 3.5 ± 0.7        | 2.5 ± 0.2        | 1.0 ± 0.1       | 2.1 ± 0.1      | 0.5 ± 0.2      | 1.2 ± 0.1       |
|                    | Val        | 31.6 ± 0.6      | 27.0 ± 2.5      | 10.7 ± 0.1       | 9.8 ± 0.1        | 8.8 ± 0.4       | 5.2 ± 0.1      | 3.5 ± 0.6      | ND              |
|                    | Met        | 15.2 ± 1.9      | 14.0 ± 1.4      | 7.1 ± 0.8        | 5.3 ± 0.5        | 1.6 ± 0.6       | ND             | ND             | ND              |
|                    | Ile        | 7.6 ± 0.5       | 6.0 ± 0.1       | 5.5 ± 0.7        | 4.5 ± 0.1        | 3.2 ± 0.5       | 1.6 ± 0.1      | 0.2 ± 0.1      | ND              |
|                    | Leu        | 24.6 ± 2.2      | 18.5 ± 1.1      | 11.2 ± 0.1       | 4.6 ± 0.5        | 0.8 ± 0.2       | 0.4 ± 0.1      | ND             | ND              |

| Variety | Amino acid | Must       | 1 d        | 2 d        | 3 d        | 5 d        | 7 d        | 10 d       | 12 d       |
|---------|------------|------------|------------|------------|------------|------------|------------|------------|------------|
|         | Trp        | 28.6 ± 3.1 | 16.9 ± 2.8 | 5.9 ± 1.0  | 2.8 ± 0.3  | 1.1 ± 0.2  | ND         | ND         | ND         |
|         | Phe        | 5.4 ± 1.0  | 8.5 ± 0.1  | 7.5 ± 1.1  | 4.3 ± 2.1  | 4.0 ± 1.4  | 3.3 ± 0.1  | 2.5 ± 0.1  | 1.4 ± 0.1  |
|         | Tyr        | 16.9 ± 1.2 | 16.5 ± 0.1 | 16.0 ± 0.1 | 17.3 ± 0.5 | 18.6 ± 1.3 | 18.5 ± 0.1 | 15.4 ± 1.9 | 16.1 ± 0.5 |

Data are mean values of two independent experiments ± standard deviation.

Table S5 Concentrations of wine fruity esters during alcoholic fermentation of Cabernet Sauvignon grape ( $\mu\text{g/L}$ )

|   | Compounds                    | Fermentation time |               |                |                 |                 |                |                 |                  |
|---|------------------------------|-------------------|---------------|----------------|-----------------|-----------------|----------------|-----------------|------------------|
|   |                              | Must              | 1 d           | 2 d            | 3 d             | 5 d             | 7 d            | 10 d            | 12 d             |
| 1 | Ethyl acetate                | 1846 $\pm$ 2      | 1951 $\pm$ 35 | 3438 $\pm$ 240 | 8608 $\pm$ 1403 | 24509 $\pm$ 827 | 25681 $\pm$ 69 | 26713 $\pm$ 508 | 27764 $\pm$ 1252 |
|   | AHAs                         | ND                | ND            | 8 $\pm$ 0      | 423 $\pm$ 13    | 1548 $\pm$ 49   | 1663 $\pm$ 75  | 2143 $\pm$ 84   | 1867 $\pm$ 128   |
| 1 | Isobutyl acetate             | ND                | ND            | ND             | 59 $\pm$ 12     | 100 $\pm$ 11    | 62 $\pm$ 2     | 37 $\pm$ 9      | 9 $\pm$ 0        |
| 2 | Isoamyl acetate              | ND                | ND            | ND             | 345 $\pm$ 0     | 1383 $\pm$ 35   | 1506 $\pm$ 59  | 1994 $\pm$ 74   | 1753 $\pm$ 127   |
| 3 | Hexyl acetate                | ND                | ND            | 1 $\pm$ 0      | 1 $\pm$ 0       | 2 $\pm$ 0       | 3 $\pm$ 0      | 1 $\pm$ 0       | 1 $\pm$ 0        |
| 4 | $\beta$ -phenylethyl acetate | ND                | ND            | 7 $\pm$ 0      | 18 $\pm$ 1      | 63 $\pm$ 3      | 92 $\pm$ 14    | 111 $\pm$ 1     | 104 $\pm$ 1      |
|   | SCFAEEs                      | ND                | ND            | ND             | 28 $\pm$ 6      | 111 $\pm$ 5     | 127 $\pm$ 4    | 138 $\pm$ 5     | 143 $\pm$ 10     |
| 1 | Ethyl butyrate               | ND                | ND            | ND             | 28 $\pm$ 6      | 111 $\pm$ 5     | 127 $\pm$ 4    | 138 $\pm$ 5     | 143 $\pm$ 10     |
|   | MCFAEEs                      | ND                | ND            | 20 $\pm$ 1     | 851 $\pm$ 152   | 2289 $\pm$ 176  | 1837 $\pm$ 123 | 1458 $\pm$ 44   | 1410 $\pm$ 108   |
| 1 | Ethyl hexanoate              | ND                | ND            | ND             | 440 $\pm$ 93    | 1146 $\pm$ 77   | 841 $\pm$ 15   | 638 $\pm$ 20    | 530 $\pm$ 40     |
| 2 | Ethyl octanoate              | ND                | ND            | 11 $\pm$ 0     | 238 $\pm$ 33    | 846 $\pm$ 74    | 587 $\pm$ 68   | 417 $\pm$ 7     | 505 $\pm$ 29     |
| 3 | Ethyl decanoate              | ND                | ND            | 9 $\pm$ 1      | 173 $\pm$ 26    | 297 $\pm$ 25    | 409 $\pm$ 40   | 403 $\pm$ 17    | 375 $\pm$ 39     |

Data are mean values of two independent experiments  $\pm$  standard deviation.



Table S6 Concentration of wine fruity esters during alcoholic fermentation of spine grape (µg/L)

|   | Compounds             | Fermentation time |           |            |          |            |              |             |             |
|---|-----------------------|-------------------|-----------|------------|----------|------------|--------------|-------------|-------------|
|   |                       | Must              | 1 d       | 2 d        | 3 d      | 5 d        | 7 d          | 10 d        | 12 d        |
| 1 | Ethyl acetate         | 2352 ± 0          | 1861 ± 17 | 2913 ± 105 | 3608 ± 7 | 8644 ± 526 | 11383 ± 1051 | 13204 ± 499 | 16168 ± 117 |
|   | AHAs                  | ND                | ND        | ND         | 9 ± 0    | 192 ± 41   | 112 ± 7      | 87 ± 0      | 84 ± 11     |
| 1 | Isobutyl acetate      | ND                | ND        | ND         | ND       | 18 ± 0     | 7 ± 0        | ND          | 1 ± 0       |
| 2 | Isoamyl acetate       | ND                | ND        | ND         | ND       | 161 ± 41   | 87 ± 5       | 66 ± 0      | 63 ± 11     |
| 3 | Hexyl acetate         | ND                | ND        | ND         | 1 ± 0    | 1 ± 0      | 1 ± 0        | 1 ± 0       | ND          |
| 4 | β-phenylethyl acetate | ND                | ND        | ND         | 8 ± 0    | 12 ± 0     | 17 ± 2       | 20 ± 0      | 20 ± 0      |
|   | SCFAEEs               | ND                | ND        | ND         | ND       | 59 ± 7     | 85 ± 4       | 101 ± 6     | 127 ± 3     |
| 1 | Ethyl butyrate        | ND                | ND        | ND         | ND       | 59 ± 7     | 85 ± 4       | 101 ± 6     | 127 ± 3     |
|   | MCFAEEs               | ND                | ND        | 47 ± 2     | 308 ± 31 | 1449 ± 108 | 1219 ± 44    | 972 ± 39    | 945 ± 25    |
| 1 | Ethyl hexanoate       | ND                | ND        | ND         | 73 ± 12  | 707 ± 73   | 531 ± 11     | 414 ± 21    | 429 ± 9     |
| 2 | Ethyl octanoate       | ND                | ND        | 35 ± 1     | 132 ± 10 | 485 ± 22   | 373 ± 18     | 295 ± 1     | 282 ± 4     |
| 3 | Ethyl decanoate       | ND                | ND        | 12 ± 1     | 103 ± 9  | 257 ± 13   | 315 ± 15     | 263 ± 17    | 234 ± 12    |

Data are mean values of two independent experiments ± standard deviation. AHA: acetates of higher alcohols; SCFAEE: short-chain fatty acid ethyl ester; MCFAEE: medium-chain fatty acid ethyl esters.

Table S7 Pearson's correlation coefficients ( $r$ ) between amino acids and wine fruity esters during alcoholic fermentation.

| Compounds | Cabernet Sauvignon |         |         | Spine grape |         |         |
|-----------|--------------------|---------|---------|-------------|---------|---------|
|           | AHAs               | SCFAEEs | MCFAEEs | AHAs        | SCFAEEs | MCFAEEs |
| Total AAs | -0.886             | -0.875  | -0.825  | -0.612      | -0.864  | -0.750  |
| Arg       | -0.884             | -0.885  | -0.849  | -0.699      | -0.875  | -0.880  |
| Asp       | -0.852             | -0.847  | -0.754  | -0.666      | -0.927  | -0.752  |
| Glu       | -0.799             | -0.781  | -0.777  | -0.837      | -0.904  | -0.920  |
| GABA      | -0.819             | -0.820  | -0.811  | -0.655      | -0.969  | -0.767  |
| Leu       | -0.858             | -0.750  | -0.818  | -0.715      | -0.761  | -0.816  |
| Met       | -0.812             | -0.728  | -0.788  | -0.711      | -0.823  | -0.860  |
| Trp       | -0.728             | -0.640  | -0.698  | -0.605      | -0.644  | -0.722  |
| Val       | -0.710             | -0.858  | -0.759  | -0.574      | -0.794  | -0.804  |
| Ala       | -0.974             | -0.961  | -0.703  | -0.723      | -0.805  | -0.681  |
| Ile       | -0.735             | -0.732  | -0.729  | -0.636      | -0.712  | -0.572  |
| Phe       | -0.975             | -0.967  | -0.895  | -0.569      | -0.701  | -0.658  |

AHA: acetates of higher alcohols; SCFAEE: short-chain fatty acid ethyl ester; MCFAEE: medium-chain fatty acid ethyl esters.

Table S8 Physiochemical indices of wine samples.

| Indices                                    | CK-CS          | CK-SP         | IN            | AA-Ala        | AA-Phe         | AA-Ile         | MAA            | IN+MAA        |
|--------------------------------------------|----------------|---------------|---------------|---------------|----------------|----------------|----------------|---------------|
| Residual sugar (g/L)                       | 2.10 ± 0.26a   | 1.83 ± 0.36cd | 1.74 ± 0.24d  | 1.93 ± 0.38bc | 1.98 ± 0.28abc | 1.97 ± 0.16abc | 2.02 ± 0.14ab  | 2.03 ± 0.29ab |
| Alcohol content (%)                        | 11.98 ± 1.08   | 12.03 ± 0.93  | 11.95 ± 0.88  | 12.09 ± 1.16  | 12.01 ± 1.34   | 12.06 ± 0.96   | 12.05 ± 1.16   | 12.05 ± 0.98  |
| Titrateable acid<br>(g/L as tartaric acid) | 7.56 ± 0.52a   | 6.49 ± 0.95b  | 6.46 ± 0.83b  | 6.45 ± 0.78b  | 6.61 ± 0.98b   | 6.46 ± 1.23b   | 6.86 ± 0.86b   | 6.76 ± 1.33b  |
| Volatile acid<br>(g/L as acetic acid)      | 0.36 ± 0.07abc | 0.36 ± 0.05c  | 0.38 ± 0.04bc | 0.43 ± 0.06a  | 0.41 ± 0.06ab  | 0.37 ± 0.05bc  | 0.39 ± 0.05abc | 0.42 ± 0.05a  |
| pH                                         | 3.3 ± 0.01f    | 3.47 ± 0.01bc | 3.51 ± 0.02a  | 3.5 ± 0.01ab  | 3.47 ± 0.02bc  | 3.44 ± 0.01    | 3.41 ± 0.01e   | 3.43 ± 0.01de |

CK-CS: Cabernet Sauvignon control; CK-SP: spine grape control. IN: DAP supplement; AA-Ala: single alanine supplement; AA-Phe: single phenylalanine supplement; AA-Ile: single isoleucine supplement; MAA: mixed nitrogen supplement with alanine, phenylalanine and isoleucine; IN+MAA: mixed nitrogen supplement with DAP, alanine, phenylalanine, and isoleucine.
